# Supplementary material for: Controlled release of microcargo from water-in-liquid crystal emulsionsviainterfacial shear induced by synthetic microstirrers
Source: Royal Society of Chemistry journal article supplement (doi:10.1039/d3sm00319a), 2023-01-01
Supplement: d3sm00319a1.pdf [file d3sm00319a1.pdf]

SI Video 1 : Methylene Blue (MB) release from 2.5v.% aqueous E7 emulsion via magnetic microstirrer rotation. The rotation speed is set to 250 RPM (right) and 1000 RPM (left).

SI Video 2 : Methylene Blue (MB) release from 2.5v.% aqueous E7 emulsion via magnetic microstirrer rotation showing the creaming effect of microdroplets. The rotation speed is set to 500 RPM.

SI Video 3 : Areal density representation of 8 M. Particles/cm<sup>2</sup>, 16 M. Particles/cm<sup>2</sup>, and 32 M. Particles/cm<sup>2</sup> on E7 without microdroplet load for better view purposes.
